# Supplementary material for: Pharmacist-led academic detailing improves statin therapy prescribing for Malaysian patients with type 2 diabetes: Quasi-experimental design
Source: PubMed Central journal article supplement (PMC6752830; doi:10.1371/journal.pone.0220458), 2019-09-19
Supplement: pone.0220458.s001.pdf [file pone.0220458.s001.pdf]

**Research Project: Assessment of Prescribing Pattern of Statins in Malaysian Type 2 Diabetic Patients Pre vs. Post Educational Intervention**

**Data Collection Form**

|                    |              |                      |
|--------------------|--------------|----------------------|
| <b>Study Site:</b> | <b>Date:</b> | <b>Patient's ID:</b> |
|--------------------|--------------|----------------------|

**A. Patient Characteristics:**

|                                                                                                     |              |                                                                                                                            |                             |
|-----------------------------------------------------------------------------------------------------|--------------|----------------------------------------------------------------------------------------------------------------------------|-----------------------------|
| <b>Age:</b>                                                                                         | <b>Sex :</b> | <b>Race :</b>                                                                                                              | <b>Weight &amp; height:</b> |
| <b>Tobacco use:</b>                                                                                 |              | <b>DM Onset:</b>                                                                                                           |                             |
| <input type="radio"/> Smoker<br><input type="radio"/> Non-smoker<br><input type="radio"/> Ex-smoker |              | <input type="radio"/> 5 years and below<br><input type="radio"/> 5 to 10 years<br><input type="radio"/> More than 10 years |                             |

**B. Indication For Treatment:**

| Indication                                                         |                                                                       |
|--------------------------------------------------------------------|-----------------------------------------------------------------------|
| <input type="radio"/> Type 2 DM Only (1 <sup>st</sup> Prophylaxis) | <input type="radio"/> Type 2 DM & ASCVD (2 <sup>nd</sup> Prophylaxis) |

**C. Laboratory Investigations**

| Lab Investigations             |                                                                            |                                                                            |         |      |
|--------------------------------|----------------------------------------------------------------------------|----------------------------------------------------------------------------|---------|------|
| Type                           | Value                                                                      |                                                                            | Reading | Date |
| LDL-C (mmol/L)                 | 1 <sup>st</sup> Prophylaxis                                                | 2 <sup>nd</sup> Prophylaxis                                                |         |      |
|                                | <input type="radio"/> < / = 2.6<br><input type="radio"/> > 2.6             | <input type="radio"/> < / = 1.8<br><input type="radio"/> > 1.8             |         |      |
| HDL-C (mmol/L)                 | Male                                                                       | Female                                                                     |         |      |
|                                | <input type="radio"/> > 1<br><input type="radio"/> < 1                     | <input type="radio"/> > 1.2<br><input type="radio"/> < 1.2                 |         |      |
| TG (mmol/L)                    | <input type="radio"/> < 1.7                                                | <input type="radio"/> > 1.7                                                |         |      |
| Venous plasma glucose (mmol/L) | Fasting                                                                    | Non-fasting                                                                |         |      |
|                                | <input type="radio"/> 4.4–6.1 mmol/L<br><input type="radio"/> > 6.1 mmol/L | <input type="radio"/> 4.4–8.0 mmol/L<br><input type="radio"/> > 8.0 mmol/L |         |      |
| A1c (%)                        | <input type="radio"/> < / = 6.5%                                           | <input type="radio"/> > 6.5%                                               |         |      |
| Renal parameters               | Creatinine value                                                           | Creatinine clearance                                                       |         |      |
|                                | ( 44-133 mmol/L)                                                           | <input type="radio"/> > 30 ml/min<br><input type="radio"/> < 30 ml/min     |         |      |

|                     |                 |                 |  |  |
|---------------------|-----------------|-----------------|--|--|
| Liver enzymes (U/L) | AST: (< 72 U/L) | ALT: (< 45 U/L) |  |  |
|---------------------|-----------------|-----------------|--|--|

**D. Drug Regimen: (statins/lipid lowering therapy)**

|                                            |                                                                                           |                                                                                                                   |
|--------------------------------------------|-------------------------------------------------------------------------------------------|-------------------------------------------------------------------------------------------------------------------|
| <b>Drug:</b>                               | <b>Dose:</b>                                                                              | <b>Duration:</b>                                                                                                  |
|                                            | <input type="radio"/> 10 mg<br><input type="radio"/> 20 mg<br><input type="radio"/> 40 mg | <input type="radio"/> 1 – 2 months<br><input type="radio"/> 3 – 6 months<br><input type="radio"/> 1 year or above |
| <b>Treatment Modifications types</b>       |                                                                                           |                                                                                                                   |
| <input type="radio"/> Dose intensification | <input type="radio"/> Dose reduction                                                      | <input type="radio"/> Discontinuation                                                                             |
| <input type="radio"/> Accretion            | <input type="radio"/> Subtraction                                                         | <input type="radio"/> Switch from / to statin                                                                     |
| <b>If any:</b>                             | <b>Date:</b>                                                                              |                                                                                                                   |

**E. Concomitant Diseases/ Medical History:**

| Disease                                                                                                                                                       | Onset | Remarks |
|---------------------------------------------------------------------------------------------------------------------------------------------------------------|-------|---------|
| <b>ASCVD:</b><br><input type="radio"/> CAD (coronary artery disease)<br><input type="radio"/> Stroke<br><input type="radio"/> PAD (peripheral artery disease) |       |         |
| <b>Hypertension</b>                                                                                                                                           |       |         |
| <b>Muscle Disorders</b>                                                                                                                                       |       |         |

**F. Concurrent Use Of Other Medications:**

| Medications For Diabetes         |      | Other Medications |      |
|----------------------------------|------|-------------------|------|
| <u>Insulin</u>                   | Dose | Drug              | Dose |
|                                  |      |                   |      |
|                                  |      |                   |      |
| <u>Oral Anti-diabetic agents</u> |      |                   |      |
|                                  |      |                   |      |
|                                  |      |                   |      |
|                                  |      |                   |      |
